# Supplementary material for: Loss of p53 enhances the function of the endoplasmic reticulum through activation of the IRE1α/XBP1 pathway
Source: PubMed Central journal article supplement (PMC4652982; doi:10.18632/oncotarget.4598), 2015-06-23
Supplement: oncotarget-06-19990-s001.pdf [file oncotarget-06-19990-s001.pdf]

## Loss of p53 enhances the function of the endoplasmic reticulum through activation of the IRE1 $\alpha$ /XBP1 pathway

### Supplementary Material

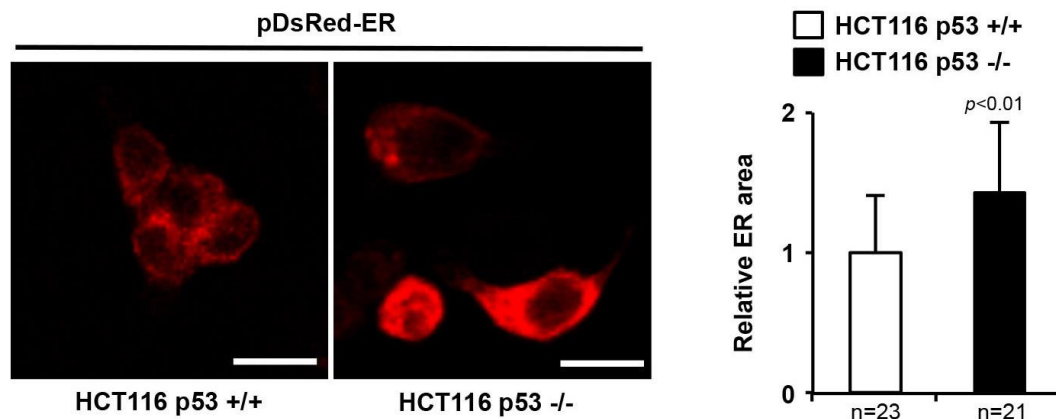

**Supplementary Fig. S1.** The amount of the ER is increased in p53-deficient cells. HCT116  $p53^{+/+}$  and HCT116  $p53^{-/-}$  cells expressing calreticulin-RFP were transduced with the pDsRed-ER vector to visualize the amount of ER using confocal microscopy. Right panel: The area of the ER area was calculated using Image J software (NIH) in three different fields (HCT116  $p53^{+/+}$ , 23 cells; HCT116  $p53^{-/-}$ , 21 cells). Values shown are the mean  $\pm$  s.d. The  $P$  value was calculated using two-way ANOVA.

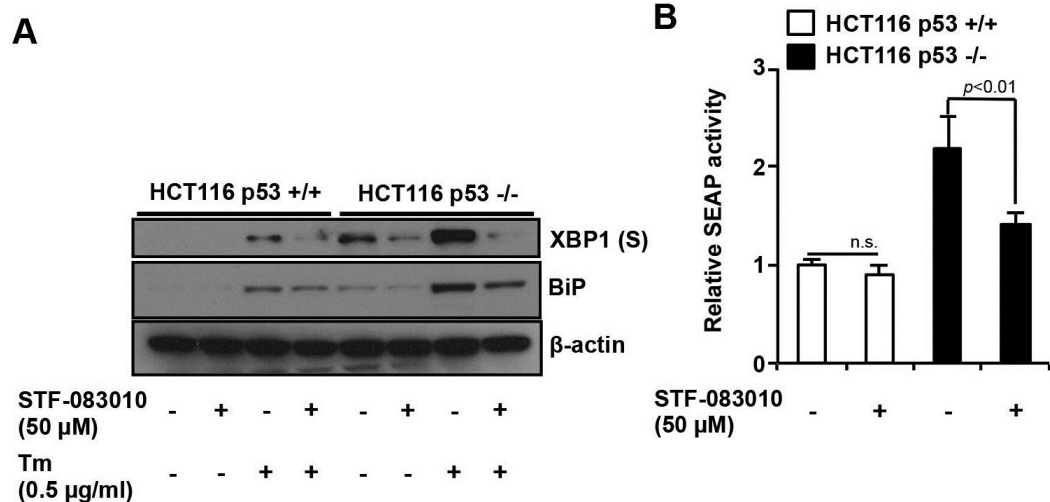

**Supplementary Figure S2.** An IRE1 $\alpha$  inhibitor inhibits the secretory function of the ER in p53-deficient cells. (A) HCT116  $p53^{+/+}$  or HCT116  $p53^{-/-}$  cells were treated with Tm (0.5 mg/mL), STF-083010 (50  $\mu$ M), or both for 6 h. Whole cell lysates were analyzed using western blotting with the indicated antibodies. (B) An IRE1 $\alpha$  inhibitor inhibits the secretory function of the ER in p53-deficient cells. HCT116  $p53^{+/+}$  and HCT116  $p53^{-/-}$  cells that expressed SEAP were treated with DMSO (-) or STF-083010 (50  $\mu$ M) (+) for 12 h. SEAP assays were performed using the same procedure described in Figure 4.
